# Supplementary material
Source: PubMed Central journal article supplement (PMC2612488)

A

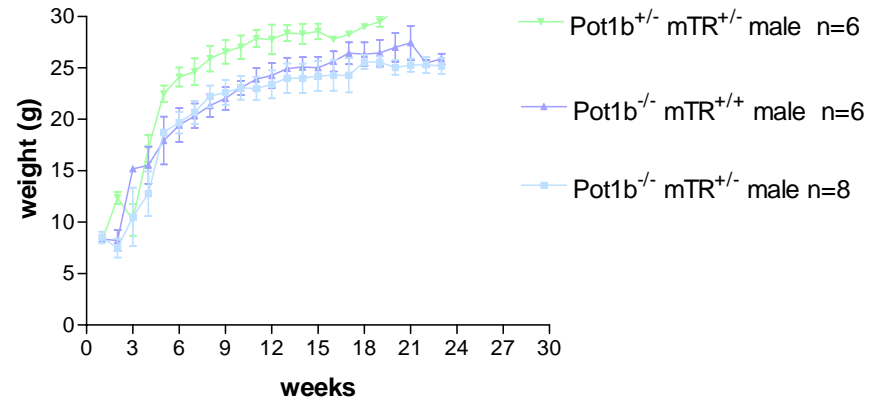

B

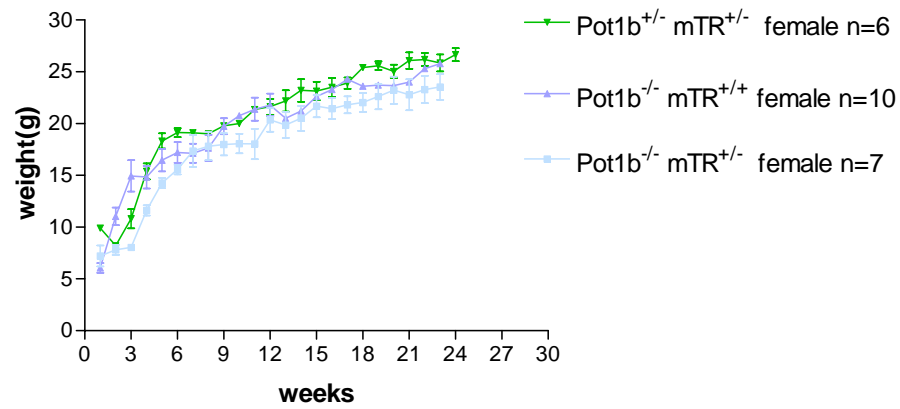

**A**

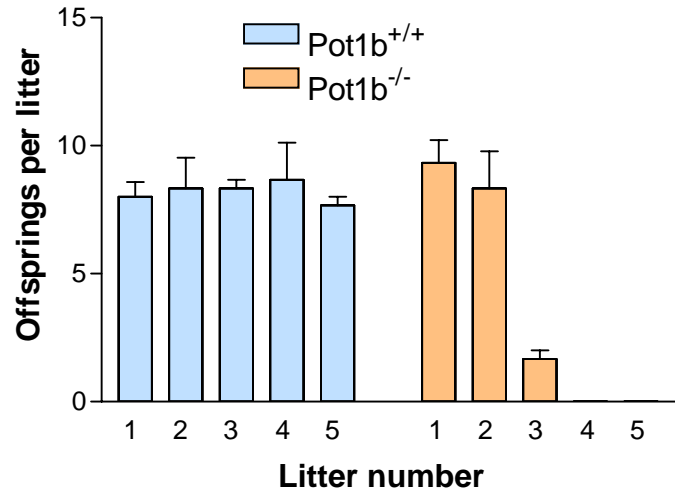

**B**

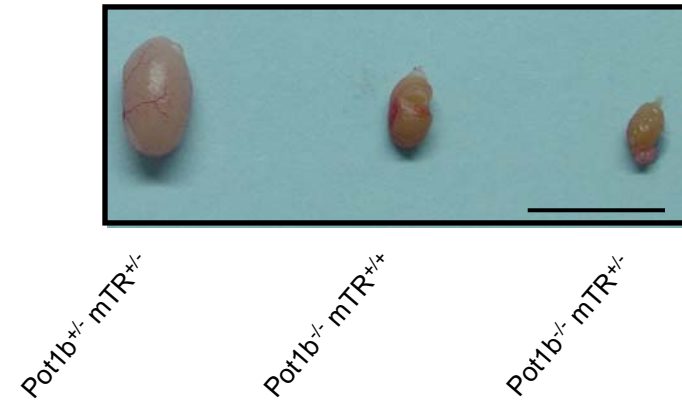

**C**

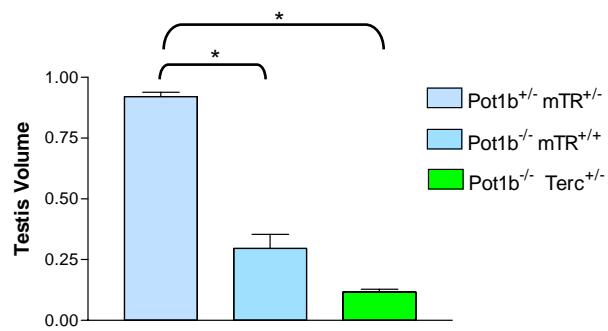

**D**

Pot1b<sup>+/-</sup> mTR<sup>+/-</sup> X Pot1b<sup>+/-</sup> mTR<sup>+/-</sup>

|     |     | Pot1b |     |     |
|-----|-----|-------|-----|-----|
|     |     | +/+   | +/- | -/- |
| mTR | +/+ | 7     | 13  | 12  |
|     | +/- | 10    | 20  | 12  |
|     | -/- | 6     | 15  | 1   |

**E**

Pot1b<sup>+/-</sup> mTR<sup>-/-</sup> X Pot1b<sup>+/-</sup> mTR<sup>-/-</sup>

|     |     | Pot1b |     |
|-----|-----|-------|-----|
|     |     | +/-   | -/- |
| mTR | +/+ | 1     | 3   |
|     | -/- | 5     | 4   |

only one survived for 2 weeks

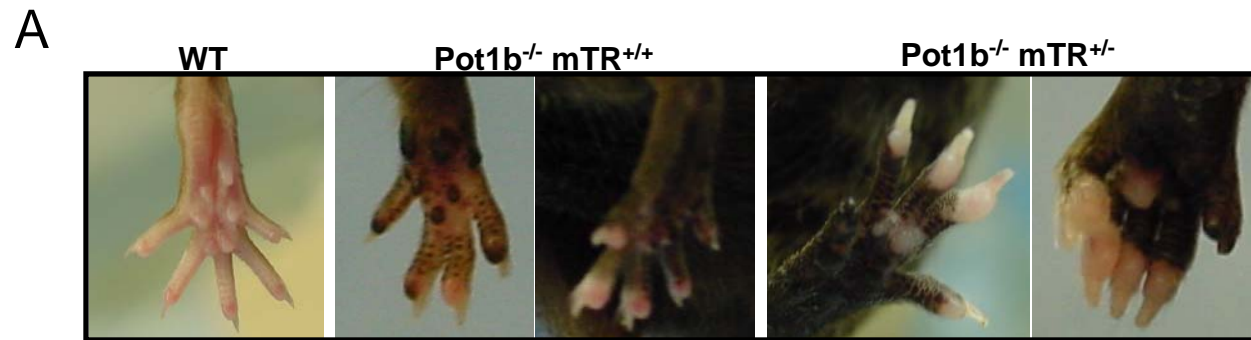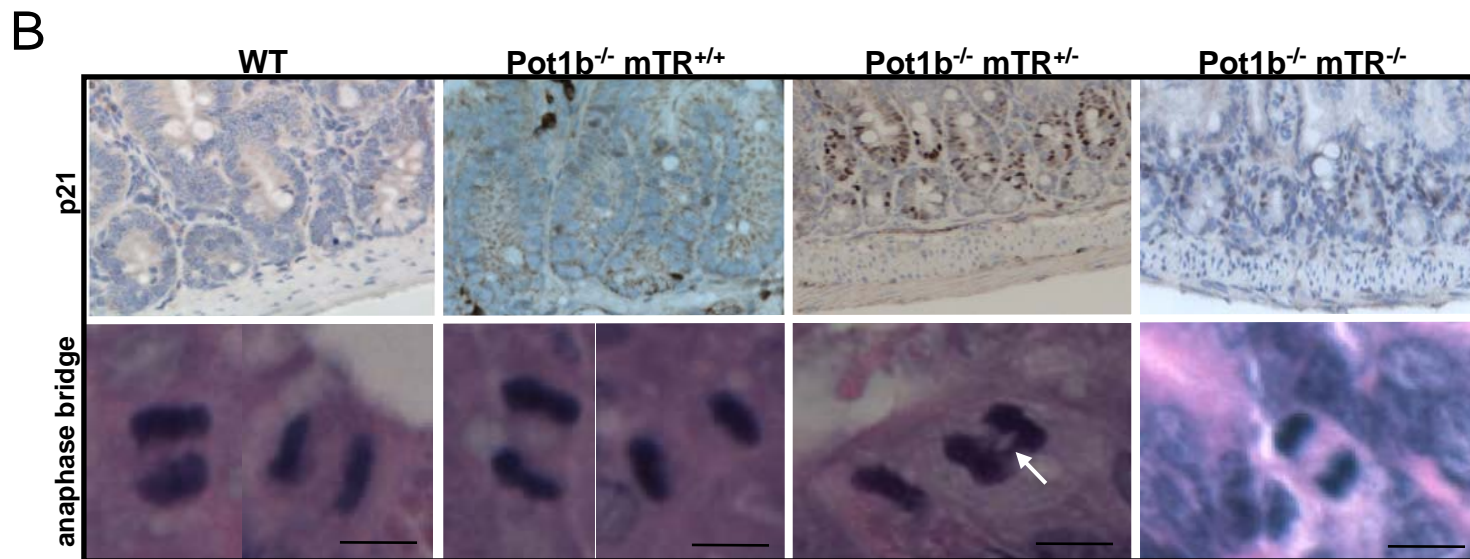

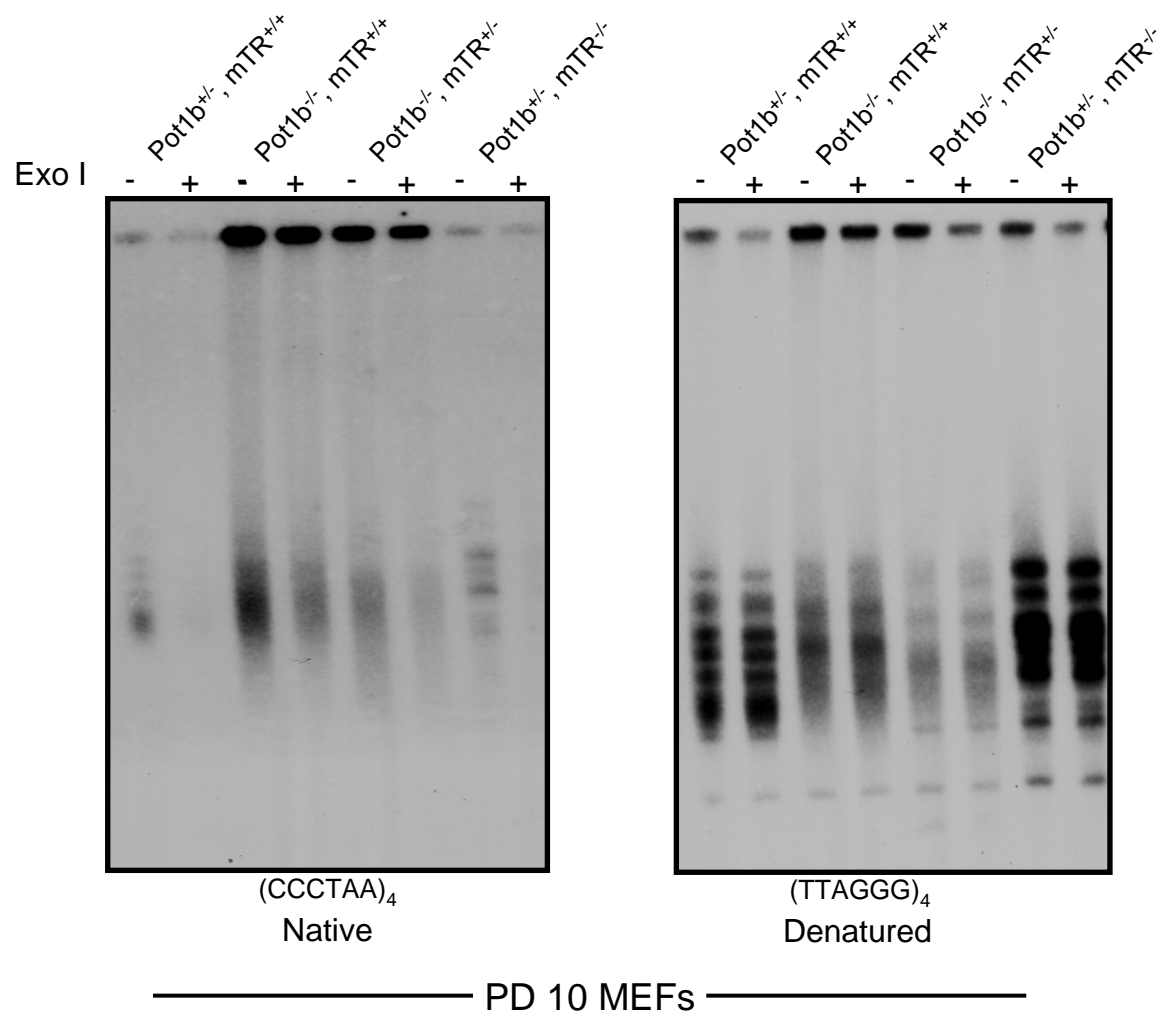

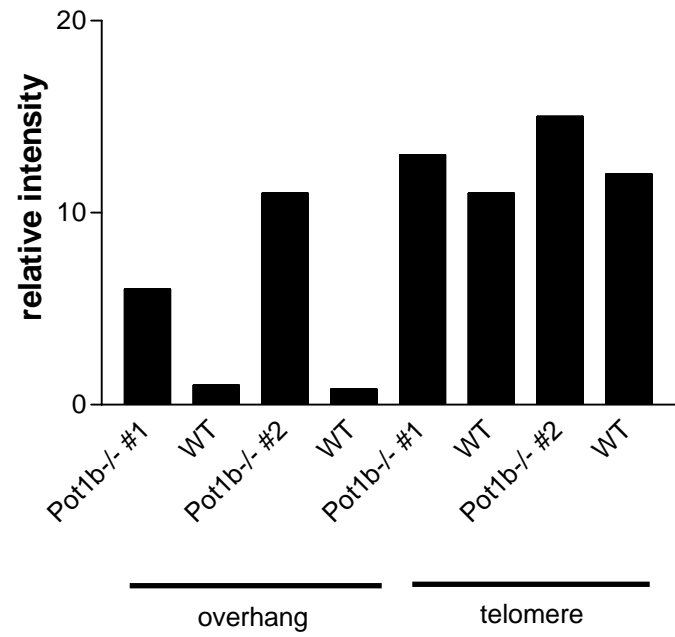

Supplement: MCB.01400-08_1.pdf [file MCB.01400-08_1.pdf]
